# Supplementary material
Source: PubMed Central journal article supplement (PMC4542563)
Supplement: str-46-2407-s001.pdf [file str-46-2407-s001.pdf]

## **Online Supplemental Data**

## Genotyping and imputation

The genetic dataset, which included other individuals not eligible for this analysis, was genotyped on the Illumina HumanExomeCore array. This array contains both exome content (~250,000 SNPs) and common tag SNPs (~250,000 SNPs) found on conventional GWAS arrays. Post-imputation, this array provides comparable coverage of common SNPs to larger arrays (MAF>5%, 78.2% of SNPs covered with  $r^2 \geq 0.8$  compared to 86.6% for Illumina OmniExpress).<sup>1</sup> SNPs were excluded with MAF<0.01, genotype missingness>3%, HWE  $p < 1e-6$  in controls, strand ambiguity (A/T or C/G) or evidence of differential missingness by case-control status ( $p < 0.05$ ). Individuals were excluded if they had missingness>3%, excess or reduced heterozygosity, showed evidence of relatedness with another individual ( $\pi\text{-hat} > 0.1875$ ), or failed a “sex-check” in PLINK. EIGENSTRAT was used to remove non-caucasian individuals, and was then repeated to calculate ancestry-informative principal components.<sup>2</sup> The remaining 269,691 autosomal SNPs and 2,603 individuals were then imputed to 1000 Genomes phase 1 (March 2012):<sup>3</sup> SHAPEIT v2 was used to phase the haplotypes and IMPUTE v2.2.2 was used to perform the imputation,<sup>4,5</sup> resulting in 9,289,526 single nucleotide polymorphisms (SNPs).

**Supplementary Table I** - Sensitivity Analyses, estimating heritability for different numbers of principal components (K=0.2% throughout)

| Phenotype        | N (case/control) | $h^2$ (SE), 1 PC | $h^2$ (SE), 5 PCs | $h^2$ (SE), 10 PCs |
|------------------|------------------|------------------|-------------------|--------------------|
| Lacunar stroke   | 1012 / 964       | 0.205 (0.064)    | 0.208 (0.065)     | 0.208 (0.065)      |
| MLI / LA subtype | 502 / 964        | 0.233 (0.087)    | 0.243 (0.087)     | 0.247 (0.087)      |
| ILI subtype      | 501 / 964        | 0.152 (0.084)    | 0.158 (0.084)     | 0.153 (0.085)      |

SE, standard error; K, prevalence of lacunar stroke; ILI, isolated lacunar infarct; MLI, multiple lacunar infarcts; LA, leukoaraiosis

**Supplementary Table II** - Sensitivity Analyses, estimating heritability for different thresholds of genetic relatedness (K=0.2% throughout)

| Phenotype        | h <sup>2</sup> (SE) for given GRM relatedness threshold |               |               |               |
|------------------|---------------------------------------------------------|---------------|---------------|---------------|
|                  | 0.125                                                   | 0.10          | 0.075         | 0.05          |
| Lacunar stroke   | 0.205 (0.064)                                           | 0.203 (0.065) | 0.203 (0.065) | 0.201 (0.065) |
| MLI / LA subtype | 0.233 (0.087)                                           | 0.232 (0.087) | 0.232 (0.087) | 0.228 (0.087) |
| ILI subtype      | 0.152 (0.084)                                           | 0.150 (0.084) | 0.150 (0.084) | 0.156 (0.084) |

SE, standard error; K, prevalence of lacunar stroke; ILI, isolated lacunar infarct; MLI, multiple lacunar infarcts; LA, leukoaraiosis

## References

1. Nelson SC, Doheny KF, Pugh EW, Romm JM, Ling H, Laurie CA, et al. Imputation-based genomic coverage assessments of current human genotyping arrays. *G3 (Bethesda, Md.)*. 2013;3:1795-1807
2. Price AL, Patterson NJ, Plenge RM, Weinblatt ME, Shadick NA, Reich D. Principal components analysis corrects for stratification in genome-wide association studies. *Nat. Genet.* 2006;38:904-909
3. Abecasis GR, Auton A, Brooks LD, DePristo MA, Durbin RM, Handsaker RE, et al. An integrated map of genetic variation from 1,092 human genomes. *Nature*. 2012;491:56-65
4. O'Connell J, Gurdasani D, Delaneau O, Pirastu N, Ulivi S, Cocca M, et al. A general approach for haplotype phasing across the full spectrum of relatedness. *PLoS Genet.* 2014;10:e1004234
5. Howie BN, Donnelly P, Marchini J. A flexible and accurate genotype imputation method for the next generation of genome-wide association studies. *PLoS Genet.* 2009;5:e1000529

## Appendix

UK Young Lacunar Stroke DNA Study (DNA Lacunar)

*Study managers:* Josie Monaghan; Alan Zanich, Samantha Febrey, Eithne Smith, Jenny Lennon, St George's University of London

*Database cleaning:* Loes Rutten-Jacobs, University of Cambridge

*Participating centres (number of enrolled patients per centre; local investigators):*

Aberdeen Royal Infirmary, Aberdeen (12; Mary Macleod). Addenbrooke's Hospital, Cambridge (54; Jean-Claude Baron, Elizabeth Warburton, Diana J Day, Julie White). Airedale General Hospital, Steeton (4; Samantha Mawer). Barnsley Hospital, Barnsley (3; Mohammad Albazzaz, Pravin Torane, Keith Elliott, Kay Hawley). Bart's and the London, London (2; Patrick Gompertz). Basingstoke and North Hampshire Hospital, Basingstoke (13; Elio Giallombardo, Deborah Dellafera). Blackpool Victoria Hospital, Blackpool (11; Mark O'Donnell). Bradford Royal Infirmary, Bradford (1; Chris Patterson). Bristol Royal Infirmary, Bristol (8; Sarah Caine). Charing Cross Hospital, London (12; Pankaj Sharma). Cheltenham General and Gloucester Royal Hospitals, Cheltenham and Gloucester (10; Dipankar Dutta). Chesterfield Royal Hospital, Chesterfield (4; Sunil Punnoose, Mahmud Sajid). Countess of Chester Hospital, Chester (22; Kausik Chatterjee). Derriford Hospital, Plymouth (4; Azlisham Mohd Nor). Dorset County Hospital NHS Foundation Trust, Dorchester (6; Rob Williams). East Kent Hospitals University NHS Foundation Trust, Kent (22; Hardeep Baht, Guna Gunathilagan). Eastbourne District General Hospital, Eastbourne (4; Conrad Athulathmudali). Frenchay Hospital, Bristol (1; Neil Baldwin). Frimley Park Hospital NHS Foundation Trust, Frimley (6; Brian Clarke). Guy's and St Thomas' Hospital, London (14; Tony Rudd). Institute of Neurology, London (25; Martin Brown). James Paget University Hospital, Great Yarmouth (1; Peter Harrison). King's College Hospital, London (16; Lalit Kalra). Leeds Teaching Hospitals NHS Trust, London (125; Ahamad Hassan). Leicester General Hospital and Royal Infirmary, Leicester (9; Tom Robinson, Amit Mistri). Luton and Dunstable NHSFT University Hospital, Luton (16; Lakshmanan Sekaran, Sakthivel Sethuraman, Frances Justin). Maidstone and Tunbridge Wells NHS Trust (3; Peter Maskell). Mayday University Hospital, Croydon (14; Enas Lawrence). Medway Maritime Hospital, Gillingham (5; Sam Sanmuganathan). Milton Keynes Hospital, Milton Keynes (1; Yaw Duodu). Musgrove Park Hospital, Taunton (9; Malik Hussain). Newcastle Hospitals NHS Foundation Trust, Newcastle upon Tyne (12; Gary Ford). Ninewells Hospital, Dundee (5; Ronald MacWalter). North Devon District Hospital, Barnstaple (8; Mervyn Dent). Nottingham University Hospitals, Nottingham (17; Philip Bath, Fiona Hammonds). Perth Royal Infirmary, Perth (2; Stuart Johnston). Peterborough City Hospital, Peterborough (1; Peter Owusu-Agyei). Queen Elizabeth Hospital, Gateshead (5; Tim Cassidy, Maria Bokhari). Radcliffe Infirmary, Oxford (5; Peter Rothwell). Rochdale Infirmary, Rochdale (4; Robert Namushi). Rotherham General Hospital, Rotherham (1; James Okwera). Royal Cornwall Hospitals NHS Trust, Truro (11; Frances Harrington, Gillian Courtauld). Royal Devon and Exeter Hospital, Exeter (22; Martin James). Royal Hallamshire Hospital, Sheffield (1; Graham Venables). Royal Liverpool University Hospital and Broadgreen Hospital, Liverpool (9; Aravind Manoj). Royal Preston Hospital, Preston (18; Shuja Punekar). Royal Surrey County Hospital, Guildford (23; Adrian Blight, Kath Pasco). Royal Sussex County Hospital, Brighton (14; Chakravarthi Rajkumar, Joanna Breeds). Royal United Hospital, Bath (6; Louise Shaw, Barbara Madigan). Salford Royal Hospital, Salford (16; Jane Molloy). Southampton General Hospital, Southampton (1; Giles Durward). Southend Hospital, Westcliff-on-Sea (26; Paul Guyler).

Southern General Hospital, Glasgow (34; Keith Muir, Wilma Smith). St George's Hospital, London (108; Hugh Markus). St Helier Hospital, Carshalton (10; Val Jones). Stepping Hill Hospital, Stockport (4; Shivakumar Krishnamoorthy). Sunderland Royal Hospital, Sunderland (1; Nikhil Majumdar). The Royal Bournemouth Hospital, Bournemouth (15; Damian Jenkinson). The Walton Centre, Liverpool (15; Richard White). Torbay Hospital, Torquay (19; Debs Kelly). University Hospital Aintree, Liverpool (19; Ramesh Durairaj). University Hospital of North Staffordshire, Stoke-on-trent (16; David Wilcock). Wansbeck General Hospital and North Tyneside Hospital, Ashington and North Shields (6; Christopher Price). West Cumberland Hospital, Whitehaven (6; Olu Orugun, Rachel Glover). West Hertfordshire Hospital, Watford (20; David Collas). Western General Hospital, Edinburgh (12; Cathie Sudlow). Western Infirmary, Glasgow (33; Kennedy R. Lees, Jesse Dawson). Wycombe Hospital and Stoke Mandeville, High Wycombe (20; Dennis Briley and Matthew Burn). Yeovil District Hospital, Yeovil (46; Khalid Rashed). York Teaching Hospital, York (1; John Coyle).
